# Supplementary material for: Frequency of Hospitalized Infections Is Reduced in Rheumatoid Arthritis Patients Who Received Biological and Targeted Synthetic Disease-Modifying Antirheumatic Drugs after 2010
Source: Hindawi journal article supplement (doi:10.1155/2018/6259010), 2018-08-14
Supplement: f1 [file 6259010.f1.pdf]

## **“Supplementary Material”**

**Supplementary Table 1.** Patient background by presence or absence of chronic lung disease

**Supplementary Table 1.** Patient background by presence or absence of chronic lung disease

| Variable                                                 | With chronic lung disease<br>(n=83) | Without chronic lung disease<br>(n=192) | <i>p</i> -value |
|----------------------------------------------------------|-------------------------------------|-----------------------------------------|-----------------|
| Gender, male (%)                                         | 23/83 (27.7%)                       | 29/192 (15.1%)                          | 0.0186*         |
| Age at starting bDMARD/tsDMARD (IQR)                     | 63 (55–70)                          | 57 (46–65)                              | 0.0025*         |
| Disease duration until bDMARD/tsDMARD initiation (month) | 65.5 (20.8–176.8)                   | 47 (12–121.5)                           | 0.0912          |
| DAS28-CRP (IQR)                                          | 4.96 (4.11–5.80)                    | 4.47 (3.58–5.39)                        | 0.0237*         |
| DAS28-ESR (IQR)                                          | 5.46 (4.61–6.40)                    | 5.13 (4.25–6.07)                        | 0.0392*         |
| Body weight (kg) (IQR)                                   | 52.2 (46.3–58.3)                    | 52.0 (46.2–59.7)                        | 0.7608          |
| No. of previous bDMARD/tsDMARD uses (IQR)                | 1 (1–2)                             | 1 (1–2)                                 | 0.808           |
| Prophylaxis with an antitubercular agent                 | 64/83 (77.1%)                       | 131/192 (68.2%)                         | 0.1501          |
| Prophylaxis with TMP-SMX                                 | 3/83 (3.61%)                        | 3/192 (1.56%)                           | 0.3705          |
| No. of PSL ≥5mg users                                    | 33/83 (39.8%)                       | 82/192 (42.7%)                          | 0.7614          |

|                                          |               |                 |         |
|------------------------------------------|---------------|-----------------|---------|
| MTX use                                  | 39/83 (47.0%) | 124/192 (64.6%) | 0.0230* |
| Diabetes mellitus (%)                    | 16/83 (19.3%) | 17/192 (8.85%)  | 0.0245* |
| Initiation of bDMARD/tsDMARD before 2010 | 33/83 (39.8%) | 90/192 (46.9%)  | 0.2931  |

DAS28: Disease Activity Score including 28-joint count, CRP: C-reactive protein, bDMARD: biological disease-modifying antirheumatic drug, tsDMARDs: targeted synthetic disease-modifying antirheumatic drug, MTX: methotrexate, TMP-SMX: trimethoprim-sulfamethoxazole. Values are median (interquartile: IQR). The *p*-values were determined using the nonparametric Wilcoxon signed rank test and Fisher's exact test.
